# Supplementary material for: Molecular Basis for Luteolin as a Natural TatD DNase Inhibitor in Trueperella pyogenes
Source: MDPI journal article supplement (doi:10.3390/ijms23158374), 2022-07-29
Supplement: s1 [file s1]

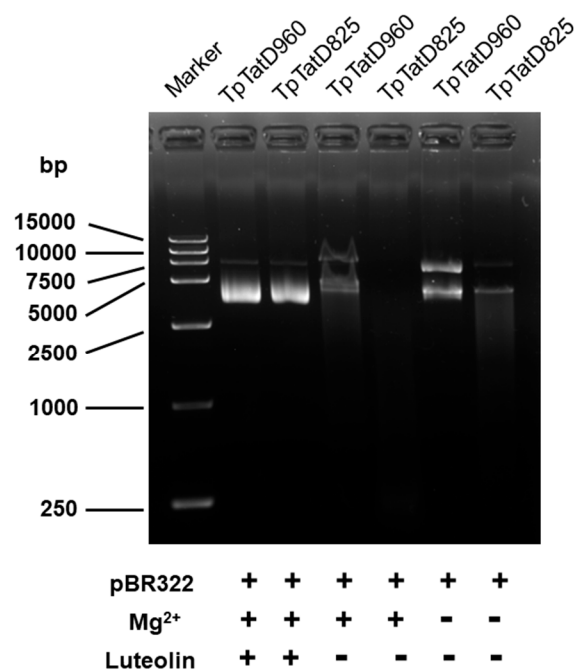

**Figure S1.** The inhibitory effect of luteolin on the hydrolysis of plasmid pBR322 by TatD DNases

**Table S1.** Antimicrobial susceptibility of luteolin against *T. pyogenes*.

| Strains   | MICs (µg/mL) | Resistance Phenotypes                   |
|-----------|--------------|-----------------------------------------|
| ATCC19411 | 78           | SUL                                     |
| BM 07-1   | 78           | CHL/OXY/TYL/CLI/SUL                     |
| BMH 06-3  | 156          | CHL/OXY/TYL/CLI/SUL                     |
| T 001     | 78           | SUL                                     |
| T 002     | 78           | SUL                                     |
| T 003     | 78           | CHL/OXY/SUL                             |
| T 004     | 78           | TIL/CLI/CIP/SUL                         |
| T 005     | 78           | CIP/SUL                                 |
| T 006     | 78           | CIP/SUL                                 |
| T 007     | 78           | CIP/SUL                                 |
| T 008     | 78           | CIP/ENR/SUL                             |
| T 009     | 78           | ENR/SUL                                 |
| T 010     | 78           | SUL                                     |
| T 011     | 78           | SUL                                     |
| T 012     | 78           | SUL                                     |
| T 013     | 78           | OXY/CIP/ENR/SUL                         |
| T 014     | 78           | CHL/OXY/ERY/CLI/SUL                     |
| T 015     | 78           | CIP/SUL                                 |
| T 016     | 78           | CHL/OXY/TET/TYL/ERY/TIL/CLI/FLO/CIP/SUL |
| T 017     | 78           | CLI/SUL                                 |

Notes: The resistance phenotypes were based on our previous research results.

Abbreviations: CHL, chlortetracycline; OXY, oxytetracycline; TET, tetracycline; TYL, tylosin; ERY, erythromycin; TIL, tilmicisin; CLI, clindamycin; FLO, florfenicol; CIP, ciprofloxacin; ENR, enrofloxacin; SUL, Sulfadimethoxine.
